# Supplementary material for: Managing an epidemic in imperfect times: encampment and immunity passes in 19th century Gibraltar
Source: HighWire-hosted journal article supplement (doi:10.1136/bmjgh-2021-006713), 2021-08-01
Supplement: bmjgh-2021-006713supp002_data_supplement.pdf [file bmjgh-2021-006713supp002_data_supplement.pdf]

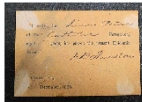

I certify, that *Liam Peña*  
of the *Catholic* Persuasion,  
aged *17* years, has passed the present Epidemic  
Fever.

*J. P. Thurston*

GIBRALTAR,

*31* December, 1823.
